# Supplementary material
Source: MDPI journal article supplement (https://www.mdpi.com/2073-4395/13/7/1833)
Supplement: s1 [file s1]

# Supplementary Material

## Transcriptomic Insights into the Development of Olecranon Honey Peach Fruits Using Two Different Planting Methods

**Table S1.** Number of reads after filtering rRNA and low quality.

| Sample       | Total    | Total Mapped (%)  | Unique Mapped (%) | Multiple Mapped (%) | Unmapped (%)    |
|--------------|----------|-------------------|-------------------|---------------------|-----------------|
| SBY-15 WAP-1 | 42541336 | 40800694 (95.91%) | 38467898 (90.42%) | 2332796 (5.48%)     | 1740642 (4.09%) |
| SBY-15 WAP-2 | 43174984 | 41392591 (95.87%) | 39628288 (91.79%) | 1764303 (4.09%)     | 1782393 (4.13%) |
| SBY-15 WAP-3 | 43806834 | 42272572 (96.50%) | 40083531 (91.50%) | 2189041 (5.00%)     | 1534262 (3.50%) |
| SBY-17 WAP-1 | 44608108 | 42734335 (95.80%) | 40920730 (91.73%) | 1813605 (4.07%)     | 1873773 (4.20%) |
| SBY-17 WAP-2 | 43666686 | 42153086 (96.53%) | 40395874 (92.51%) | 1757212 (4.02%)     | 1513600 (3.47%) |
| SBY-17 WAP-3 | 43830956 | 42327860 (96.57%) | 40791703 (93.07%) | 1536157 (3.50%)     | 1503096 (3.43%) |
| SBY-19 WAP-1 | 44932540 | 43148515 (96.03%) | 41570745 (92.52%) | 1577770 (3.51%)     | 1784025 (3.97%) |
| SBY-19 WAP-2 | 43577092 | 42166417 (96.76%) | 40584588 (93.13%) | 1581829 (3.63%)     | 1410675 (3.24%) |
| SBY-19 WAP-3 | 43988468 | 42602058 (96.85%) | 41110825 (93.46%) | 1491233 (3.39%)     | 1386410 (3.15%) |
| SJH-15 WAP-1 | 44651486 | 42944073 (96.18%) | 40956827 (91.73%) | 1987246 (4.45%)     | 1707413 (3.82%) |
| SJH-15 WAP-2 | 43702964 | 42352772 (96.91%) | 40250124 (92.10%) | 2102648 (4.81%)     | 1350192 (3.09%) |
| SJH-15 WAP-3 | 44374164 | 42973631 (96.84%) | 39845089 (89.79%) | 3128542 (7.05%)     | 1400533 (3.16%) |
| SJH-17 WAP-1 | 48229486 | 46333093 (96.07%) | 44023571 (91.28%) | 2309522 (4.79%)     | 1896393 (3.93%) |
| SJH-17 WAP-2 | 43281486 | 41823141 (96.63%) | 39857854 (92.09%) | 1965287 (4.54%)     | 1458345 (3.37%) |
| SJH-17 WAP-3 | 44490636 | 43036222 (96.73%) | 40125924 (90.19%) | 2910298 (6.54%)     | 1454414 (3.27%) |
| SJH-19 WAP-1 | 46124438 | 44286230 (96.01%) | 41912799 (90.87%) | 2373431 (5.15%)     | 1838208 (3.99%) |

|              |          |                   |                   |                 |                 |
|--------------|----------|-------------------|-------------------|-----------------|-----------------|
| SJH-19 WAP-2 | 44858728 | 43371335 (96.68%) | 40608694 (90.53%) | 2762641 (6.16%) | 1487393 (3.32%) |
| SJH-19 WAP-3 | 44125870 | 42703010 (96.78%) | 39934132 (90.50%) | 2768878 (6.27%) | 1422860 (3.22%) |

**Table S2.** Comparing the numbers of DEGs of ‘SJH’ and ‘SBY’.

|                           | UP   | DOWN |
|---------------------------|------|------|
| SJH-17 WAP vs. SJH-15 WAP | 326  | 493  |
| SJH-19 WAP vs. SJH-17 WAP | 329  | 765  |
| SBY-17 WAP vs. SBY-15 WAP | 1070 | 1191 |
| SBY-19 WAP vs. SBY-17 WAP | 2688 | 2129 |
| SJH-15 WAP vs. SBY-15 WAP | 743  | 1022 |
| SJH-17 WAP vs. SBY-17 WAP | 1837 | 2485 |
| SJH-19 WAP vs. SBY-19 WAP | 504  | 1630 |

\*Log2(FC)≥1, Q≤0.05

**Table S3.** Pairs of primers used to amplify the targeting genes by qPCR.

| Target Genes  |   | Sequence (5'-3')          | Product Size |
|---------------|---|---------------------------|--------------|
| ncbi_18789554 | F | TCGTTGGGGTGGAGAATGTT      | 157bp        |
|               | R | AACAGGGGGAATCAATGCCA      |              |
| ncbi_18777071 | F | GACGACGATTGCTTTGTTGCT     | 163bp        |
|               | R | GACTGAAGGGGTAAACCACGG     |              |
| ncbi_18770520 | F | TACACCGTCTTCCTGCCTCT      | 105bp        |
|               | R | AACAGCAGAATCTCCACTCTCG    |              |
| ncbi_18791135 | F | GCACTAAGAGAGTGGAGGGC      | 135bp        |
|               | R | GCCCGTTAGACTGGGACAAA      |              |
| ncbi_18774451 | F | ATGGCCCTGAGATCGCTTAC      | 108bp        |
|               | R | CAGCAAGCTCAACCGCGTTA      |              |
| ncbi_18767223 | F | TTGCCCTTCTCTCCAGGTATG     | 103bp        |
|               | R | TGTTTGGCTTCATCACCGCT      |              |
| ncbi_18788353 | F | GCAATGGGGCCTACTGGAAA      | 124bp        |
|               | R | GCAACGGATTGGGATAAGTAGGA   |              |
| ncbi_18769018 | F | ATGGTCAGCTATCAGGAACCG     | 188bp        |
|               | R | ACCCTTCAATGTGACTGGGC      |              |
| ncbi_18768307 | F | TCTCACCGACTTGGGTTTCA      | 111bp        |
|               | R | TTCCGGATTTGGTCCAGTCG      |              |
| ncbi_18772722 | F | GTTTCTACAGCAAGCGGGTG      | 165bp        |
|               | R | CAACCAGTCTAGGGCTCCAC      |              |
| ncbi_18778944 | F | CCTATGGCGAGGAGGATTCTG     | 180bp        |
|               | R | TCCACGCAACACTCCCATAC      |              |
| ncbi_18792321 | F | GCGCAAATACTCGACAACGG      | 172bp        |
|               | R | AACCCAACGAGGACAGATAGT     |              |
| Actin         | F | AGCAGAGCGATTCCGTTGTCC     | 153bp        |
|               | R | CCTCCACTCAGCACTATGTTACCAT |              |

a

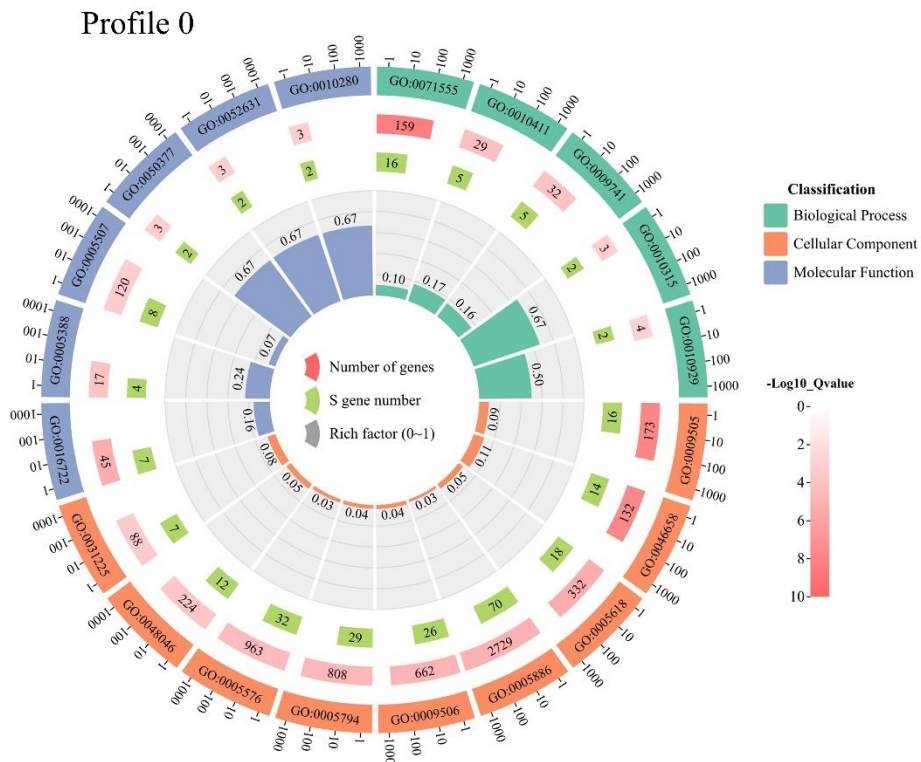

b

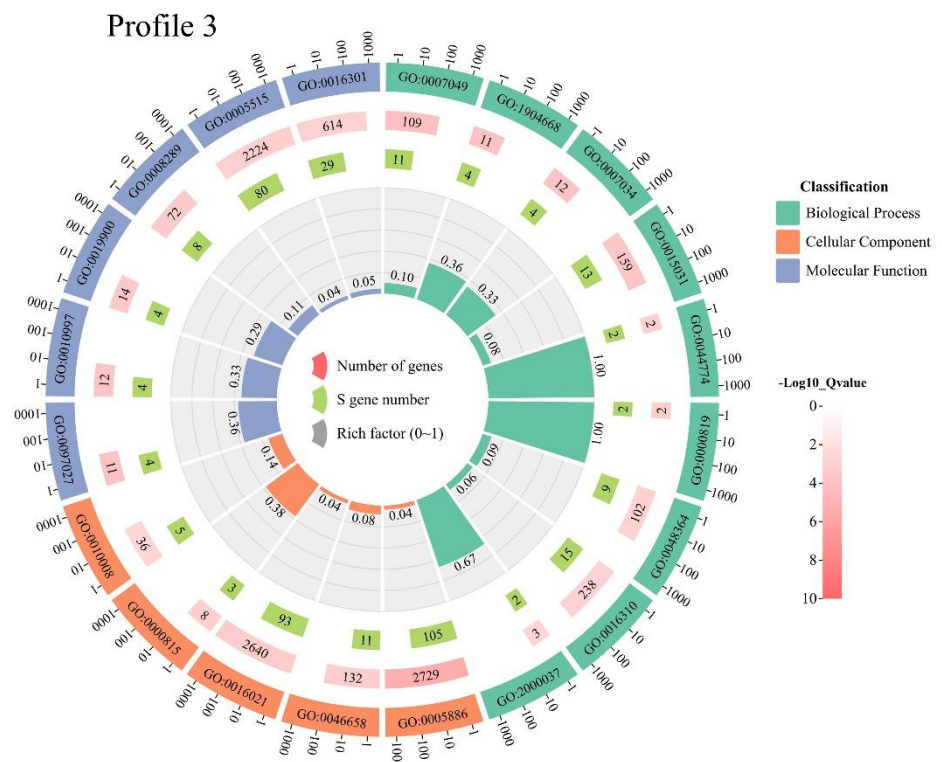

Profile 3

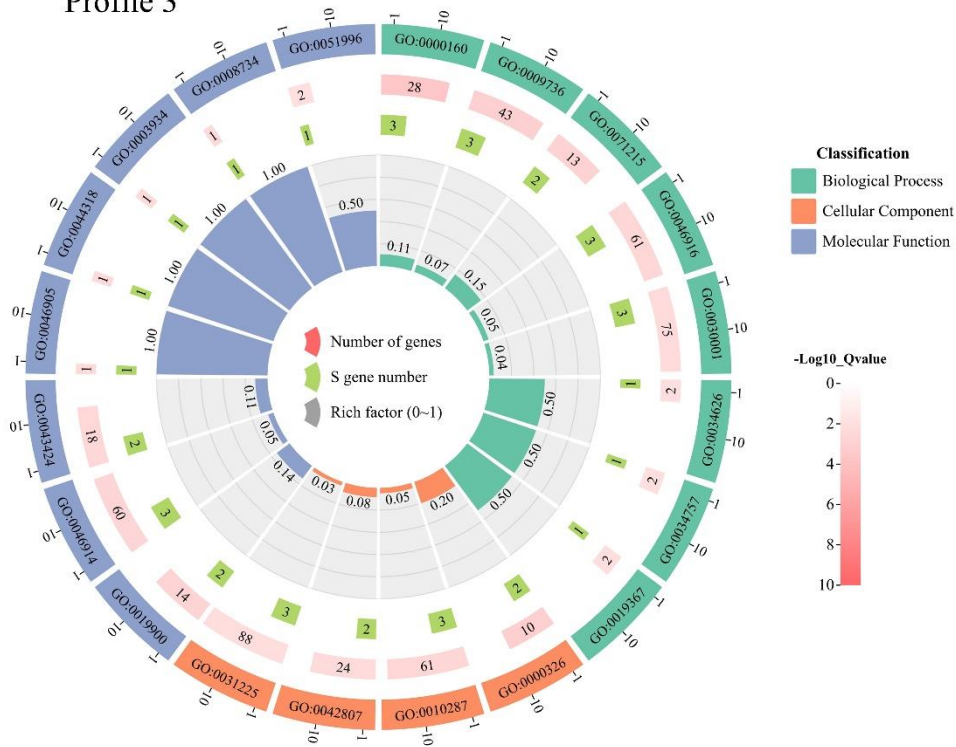

Profile 4

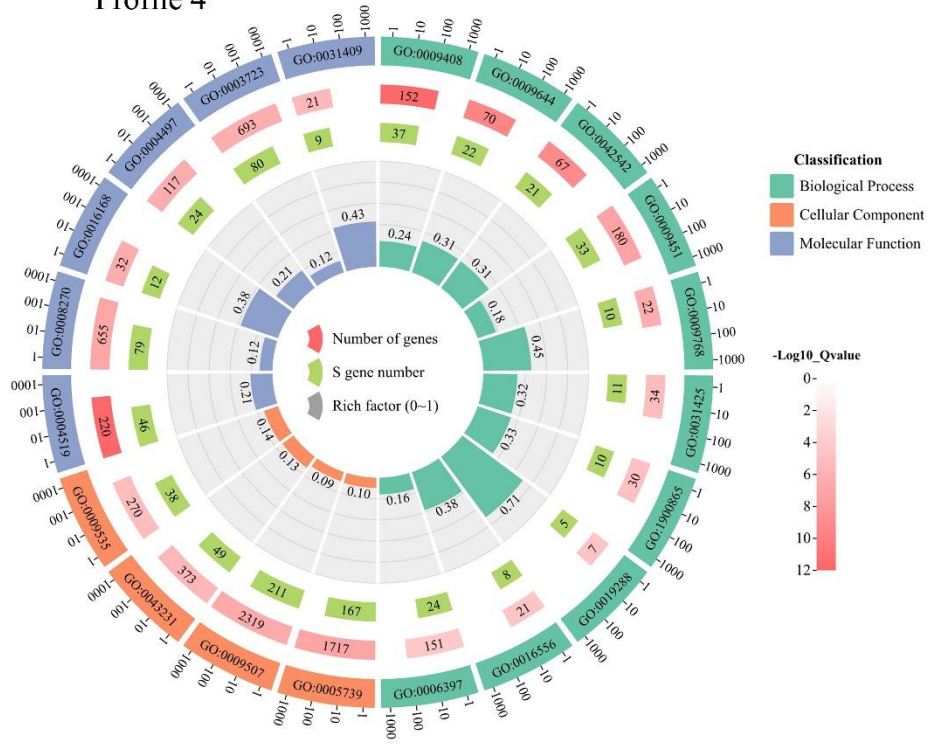

Profile 7

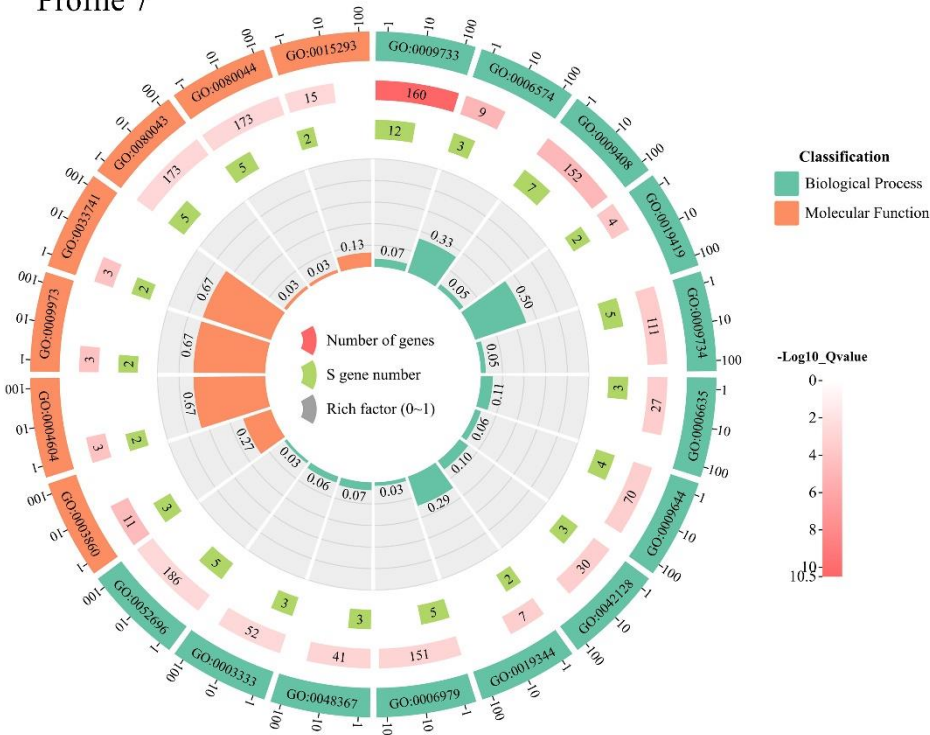

**Figure S1.** GO enrichment circle plot based on the clustering analysis results in Figure 6. (a) ‘SJH’ enrichment circle plot of up and downregulated profiles, and profiles 0 and 3 are downregulated enrichment circle plots and profile 7 is the upregulated enrichment circle plot. (b) ‘SBY’ enrichment circle enrich plot of up and downregulated profiles, and profile 3 is the downregulated enrichment circle plot, while profile 4 is the upregulated enrichment circle plot. The outermost circle color indicates the GO terms classification, while the character indicates the GO terms code. The color of the second outer circle indicates the q-value, and the number represents the number of background genes. The number in the third circle indicates the number of genes mapped to the GO term. The innermost circle color indicates the GO classification, while the number indicates the rich factor.



a

Profile 0 Top 20 of KEGG Enrichment

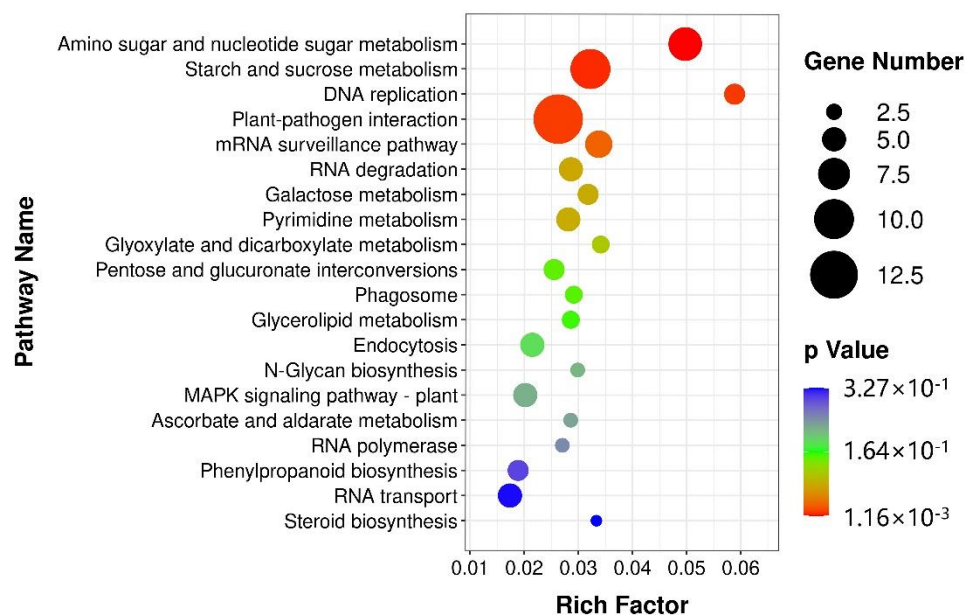

b

Profile 3 Top 20 of KEGG Enrichment

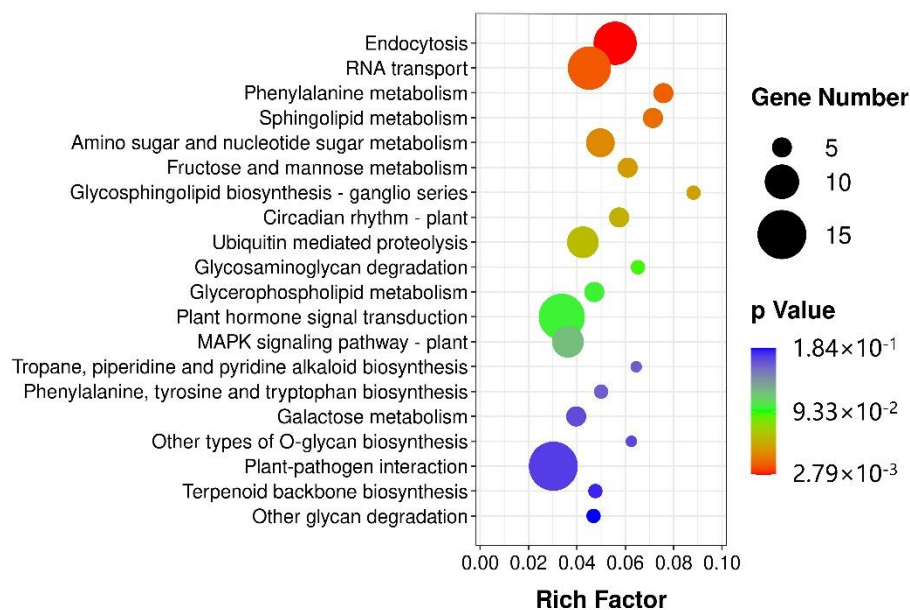

Profile 3 Top 20 of KEGG Enrichment

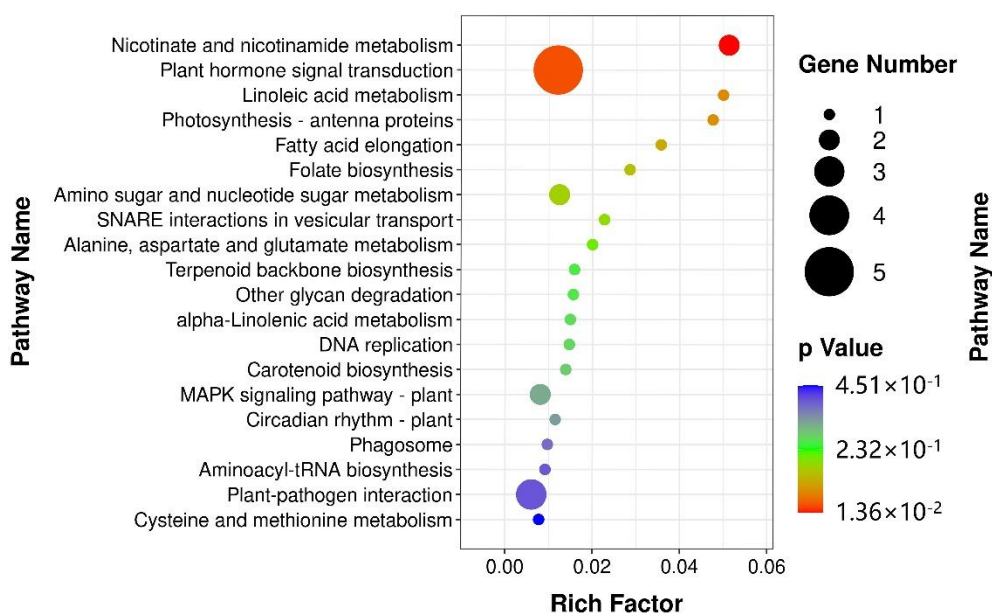

Profile 4 Top 20 of KEGG Enrichment

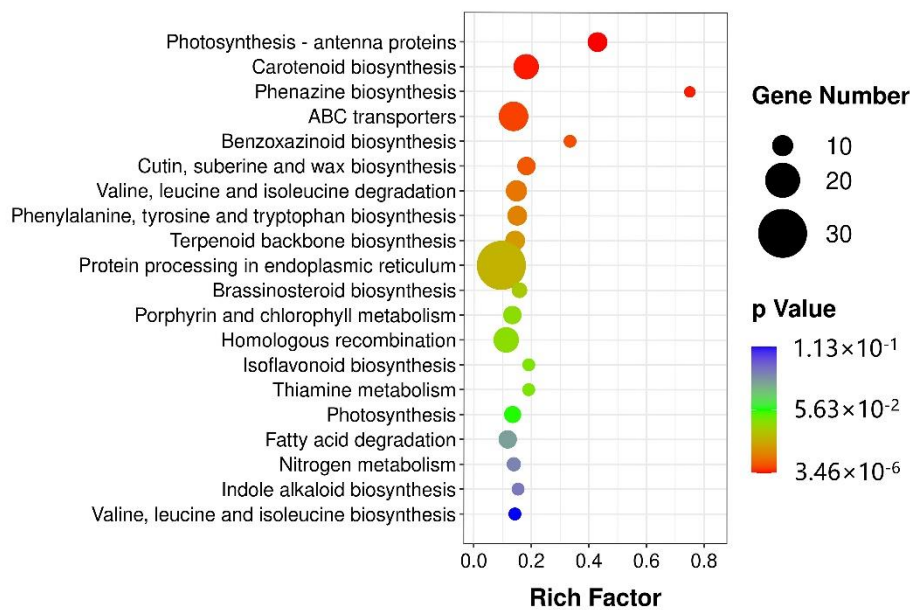

Profile 7 Top 20 of KEGG Enrichment

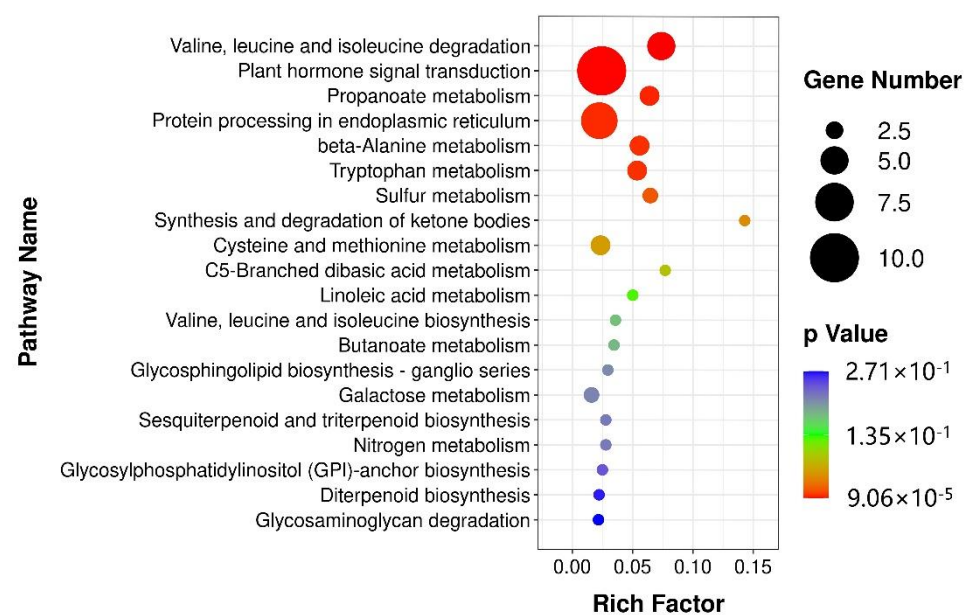

**Figure S2.** KEGG enrichment bubble diagram based on the clustering analysis results in Figure 6. (a) ‘SJH’ bubble diagram of up and downregulated profiles, and profiles 0 and 3 are down-regulated enrichment bubble diagram and profile 7 is the upregulated enrichment bubble diagram. (b) ‘SBY’ bubble diagram of up and downregulated profiles, and profile 3 is the downregulated enrichment bubble diagram, while profile 4 is the upregulated enrichment bubble diagram. The color of each circle and the size indicate the  $p$ -value and the number of genes mapped to the pathway, respectively.
